# Supplementary material
Source: publisher figshare collection journal article supplement (https://frontiersin.figshare.com/ndownloader/files/22198908)
Supplement: Supplementary file [file 22198908]

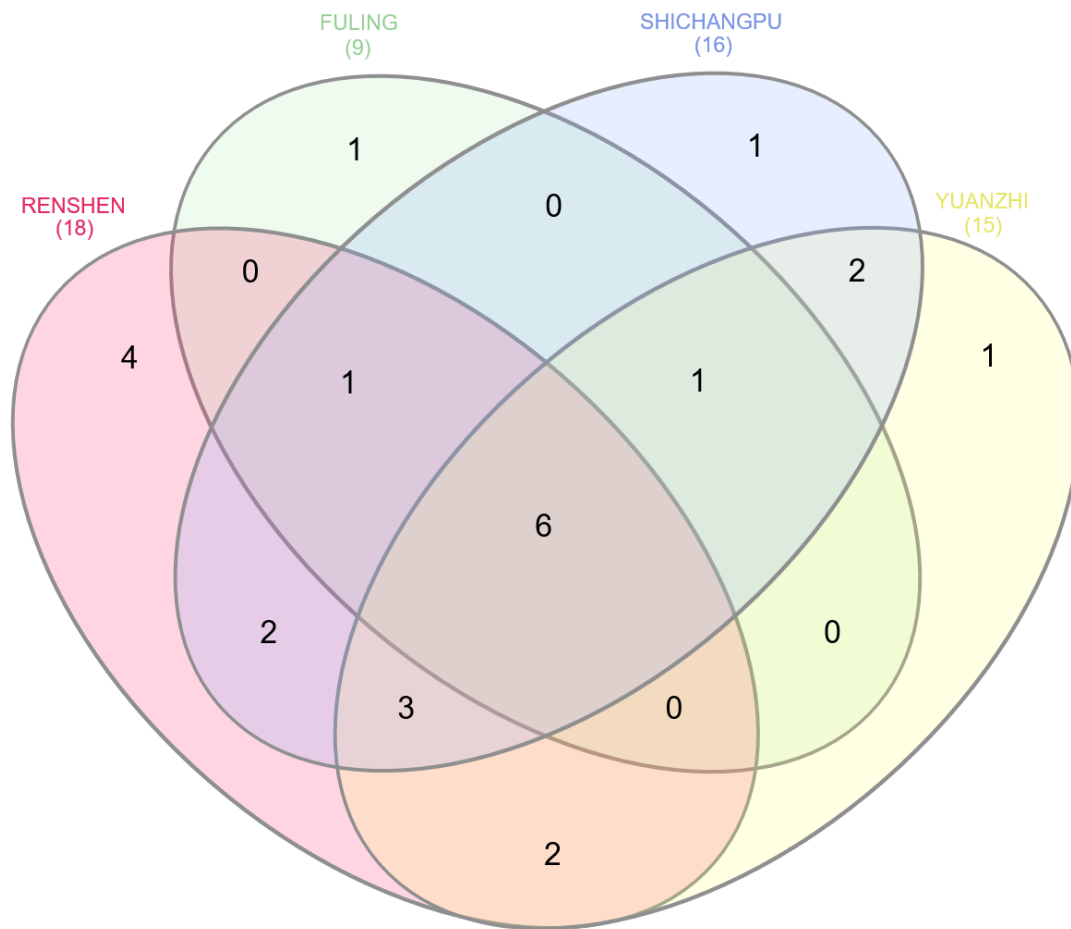

**FIGURE S1** | Venn diagram of 39AD-associated targets of KXS.
